# Supplementary material
Source: PubMed Central journal article supplement (PMC7097030)
Supplement: 41579_2010_BFnrmicro2440_MOESM6_ESM.pdf [file 41579_2010_BFnrmicro2440_MOESM6_ESM.pdf]

S3 | Research effort on viral host jumps.

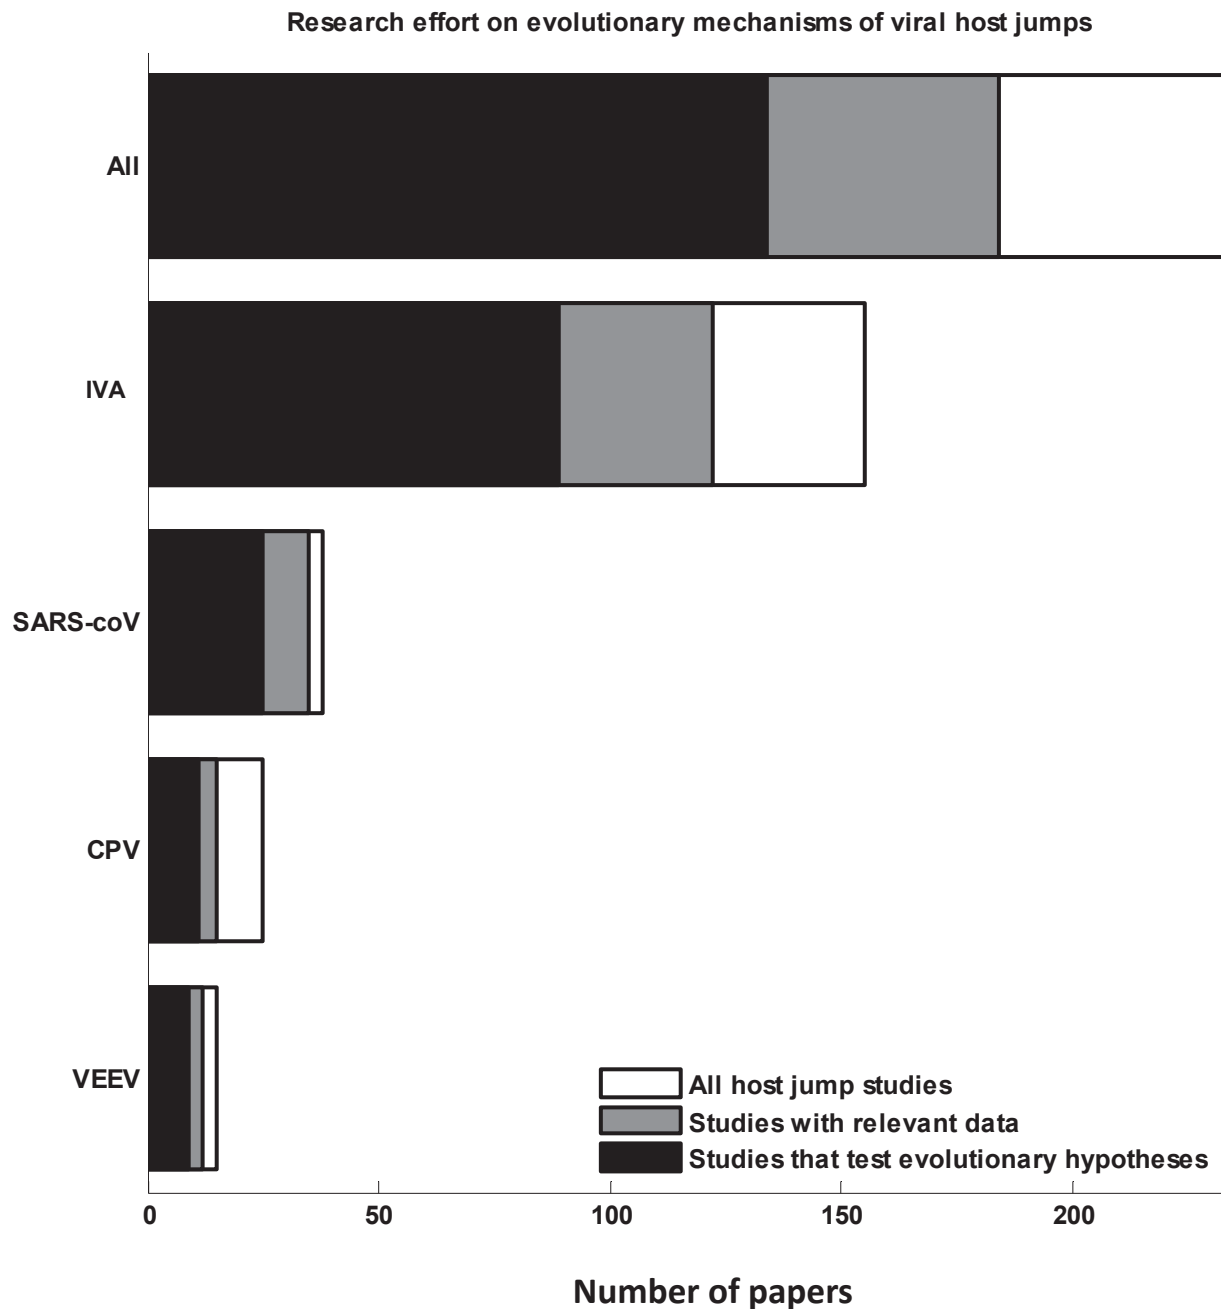

Total numbers of papers for all 4 viruses combined (All) and each virus individually are shown on the x-axis. Papers were categorized into three broad groups: 1) host jump studies that do not collect evolutionary data (white bars, papers not reviewed), 2) host jump studies that collect evolutionary data but do not interpret the role of evolutionary processes in the host jump (grey bars, broadly reviewed), and 3) host jump studies that collect evolutionary data and explicitly interpret the role of evolutionary processes (black bars, fully reviewed).
