# Supplementary material
Source: PubMed Central journal article supplement (PMC7097030)
Supplement: 41579_2010_BFnrmicro2440_MOESM7_ESM.pdf [file 41579_2010_BFnrmicro2440_MOESM7_ESM.pdf]

S4 | Inclusion of experiment in studies with relevant data.

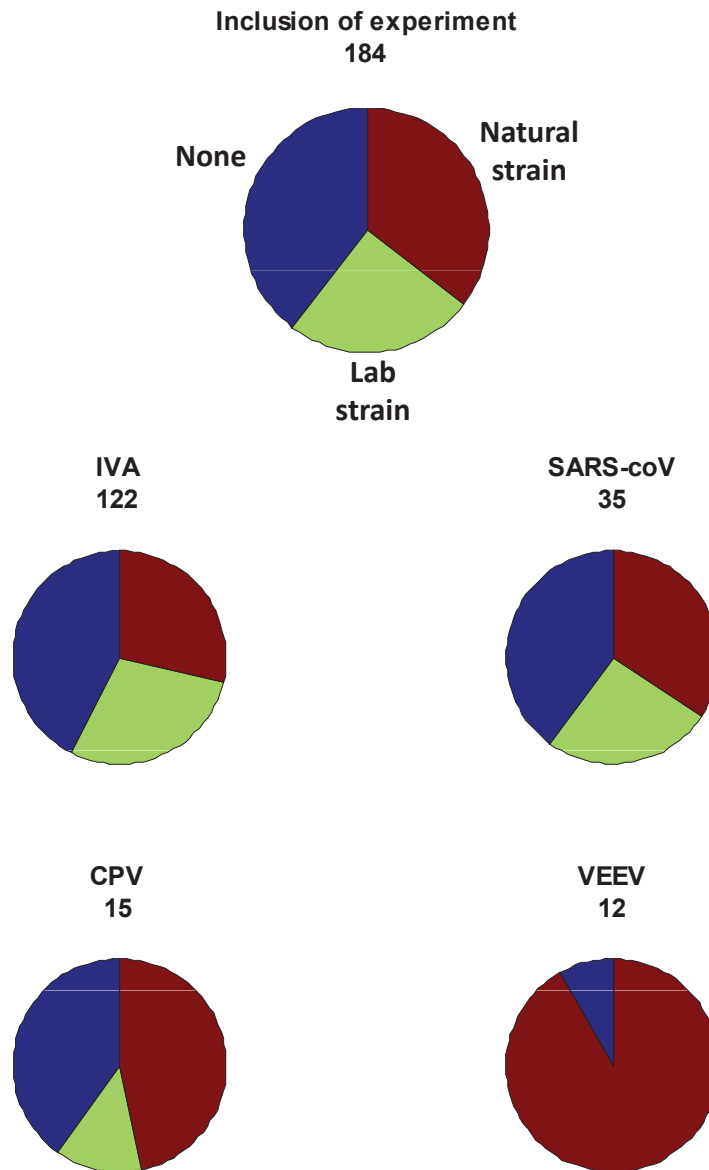

All studies with relevant data grouped by presence of experiment and whether the target virus was sampled from nature. Studies for all four viruses are combined in the top chart. Three categories are: No experiment (blue), experiment on artificial strains (green, i.e., passaged extensively in the lab) and experiment on natural strains (red). Numbers indicate the total number of papers surveyed.
