# Supplementary material
Source: PubMed Central journal article supplement (PMC7097030)
Supplement: 41579_2010_BFnrmicro2440_MOESM10_ESM.pdf [file 41579_2010_BFnrmicro2440_MOESM10_ESM.pdf]

S7 | Model systems in experimental studies.

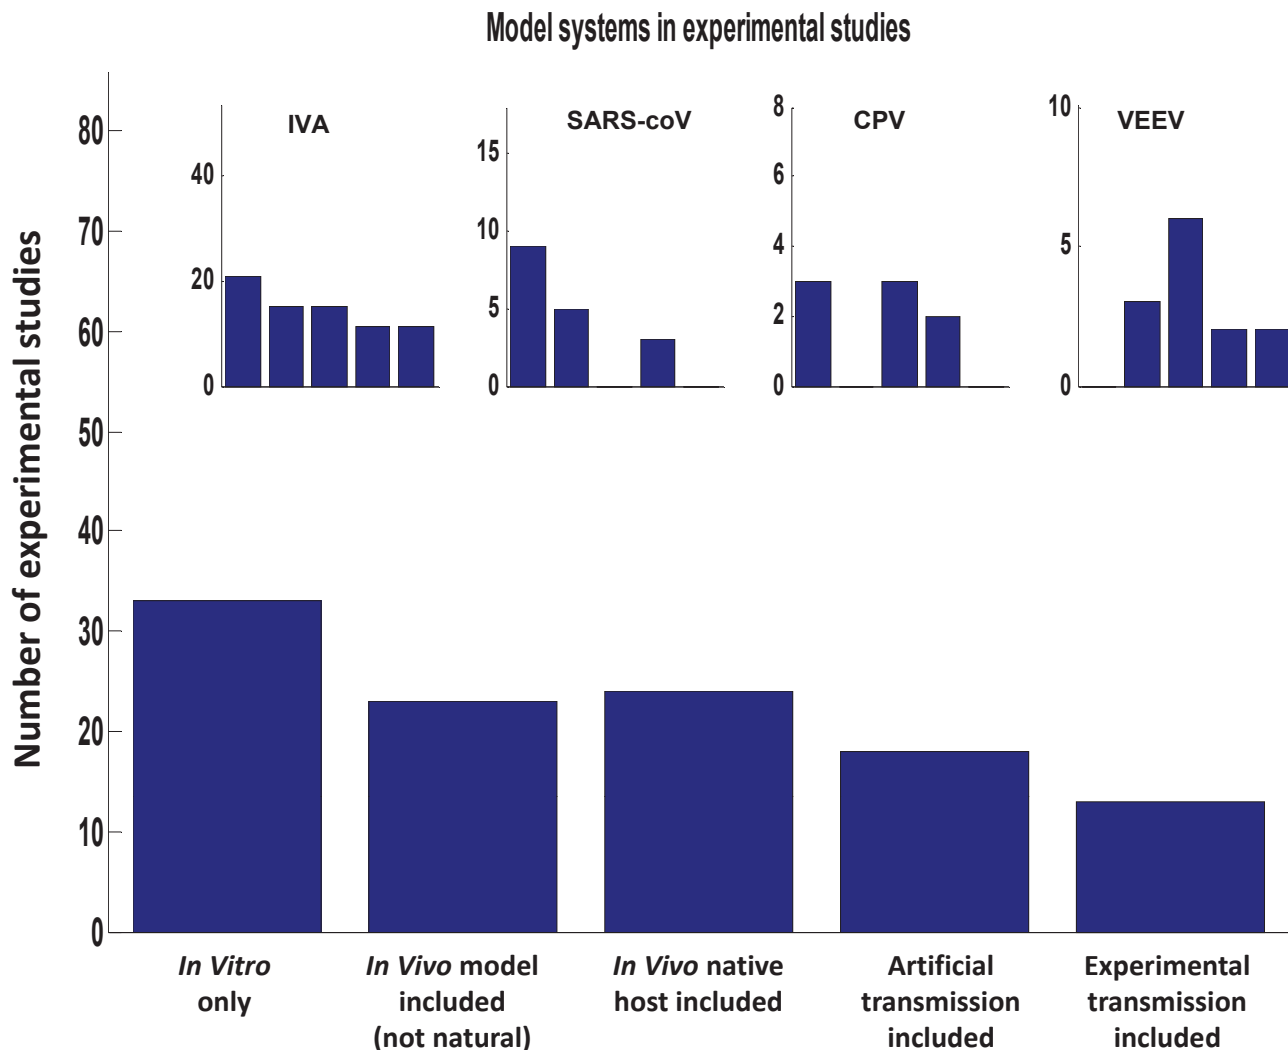

Data for all viruses are shown on the bottom plot. The inset shows the patterns by virus. There are five categories which are not mutually exclusive shown from left to right : 1) The study only uses an in vitro or cell culture-based host model system, 2) The study includes an animal host model that is not a natural component of the host jump system being studied, 3) The study includes an animal host model that is a natural component of the host jump system, 4) The study includes passaging as a form of transmission, 5) The study includes experimental transmission (i.e., hosts are allowed some degree of exposure to one another so that transmission can occur via a natural route). Maximum value on Y-axis is the total number of experimental studies for all viruses.
